# Supplementary material
Source: PubMed Central journal article supplement (PMC3375954)
Supplement: supp_pp.112.195198_195198Wormit_et_al_Sup_Figure_1.pdf [file supp_pp.112.195198_195198Wormit_et_al_Sup_Figure_1.pdf]

Figure S1

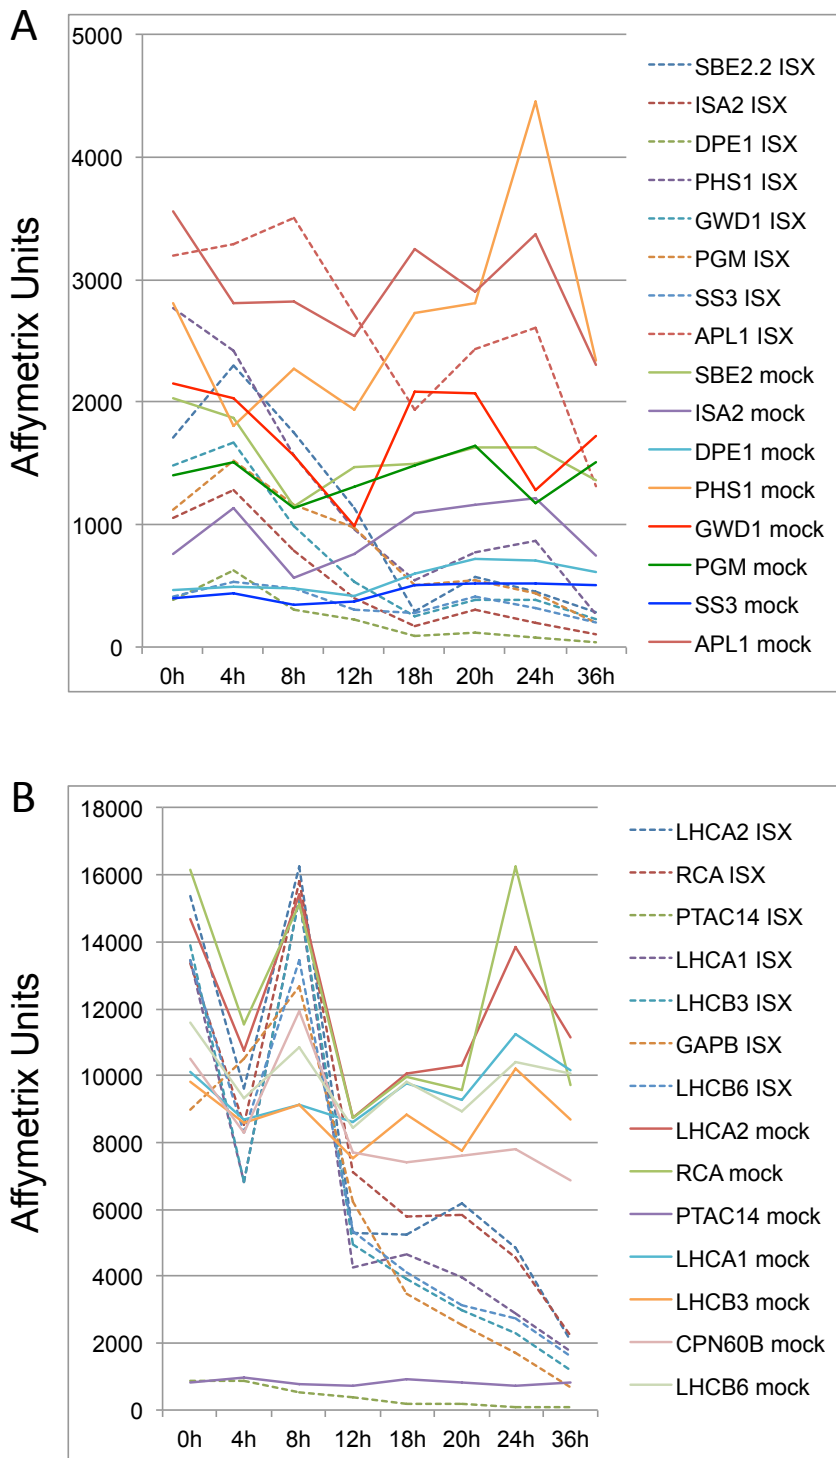

**Figure S1:** Effects of ISX and mock treatments on transcript levels of genes involved in starch metabolism (**A**) and photosynthesis (**B**). ISX treatment indicated by dashed and mock by solid lines. Y-axis indicates transcript levels expressed in Affymetrix units; X-axis shows time in hours. *At3g61470* (*LHCA2*), *At3g54890* (*LHCA1*), *At5g54270* (*LHCB3*), *At1g15820* (*LHCB6*), *At2g39730* (*RCA*), *At1g55490* (*CPN60B*), *At4g20130* (*PTAC14*), *At1g42970* (*GAPB*), *At1g10760* (*GWD1*), *At5g03650* (*SBE2.2*), *At5g64860* (*DPE1*), *At5g51820* (*PGM*), *At5g48300* (*ADG1*), *At1g03310* (*ISA2*), *At3g29320* (*PHS1*), *At1g11720* (*SS3*).
