# Supplementary material
Source: PubMed Central journal article supplement (PMC3375954)
Supplement: supp_pp.112.195198_195198Wormit_et_al_Sup_Figure_2.pdf [file supp_pp.112.195198_195198Wormit_et_al_Sup_Figure_2.pdf]

Figure S2

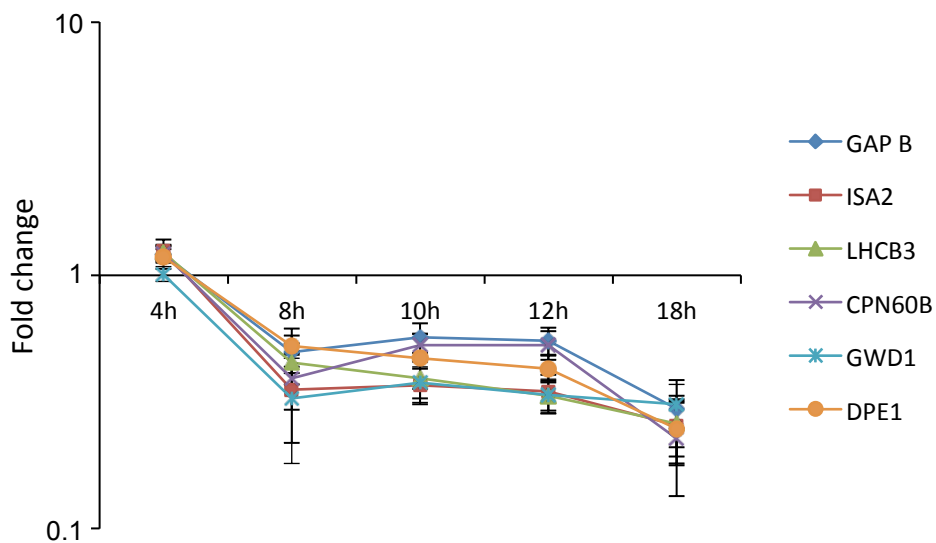

**Figure S2:** qRT-PCR based expression profiling of *Arabidopsis* seedlings treated with DCB for up to 18 h. Y-axis shows fold-change of ISX- vs mock-treated samples, X-axis shows time in hours. Values are the means and SEM are based on three biological replicates.
