# Supplementary material
Source: PubMed Central journal article supplement (PMC3375954)
Supplement: supp_pp.112.195198_195198Wormit_et_al_Sup_Figure_3.pdf [file supp_pp.112.195198_195198Wormit_et_al_Sup_Figure_3.pdf]

Figure S3

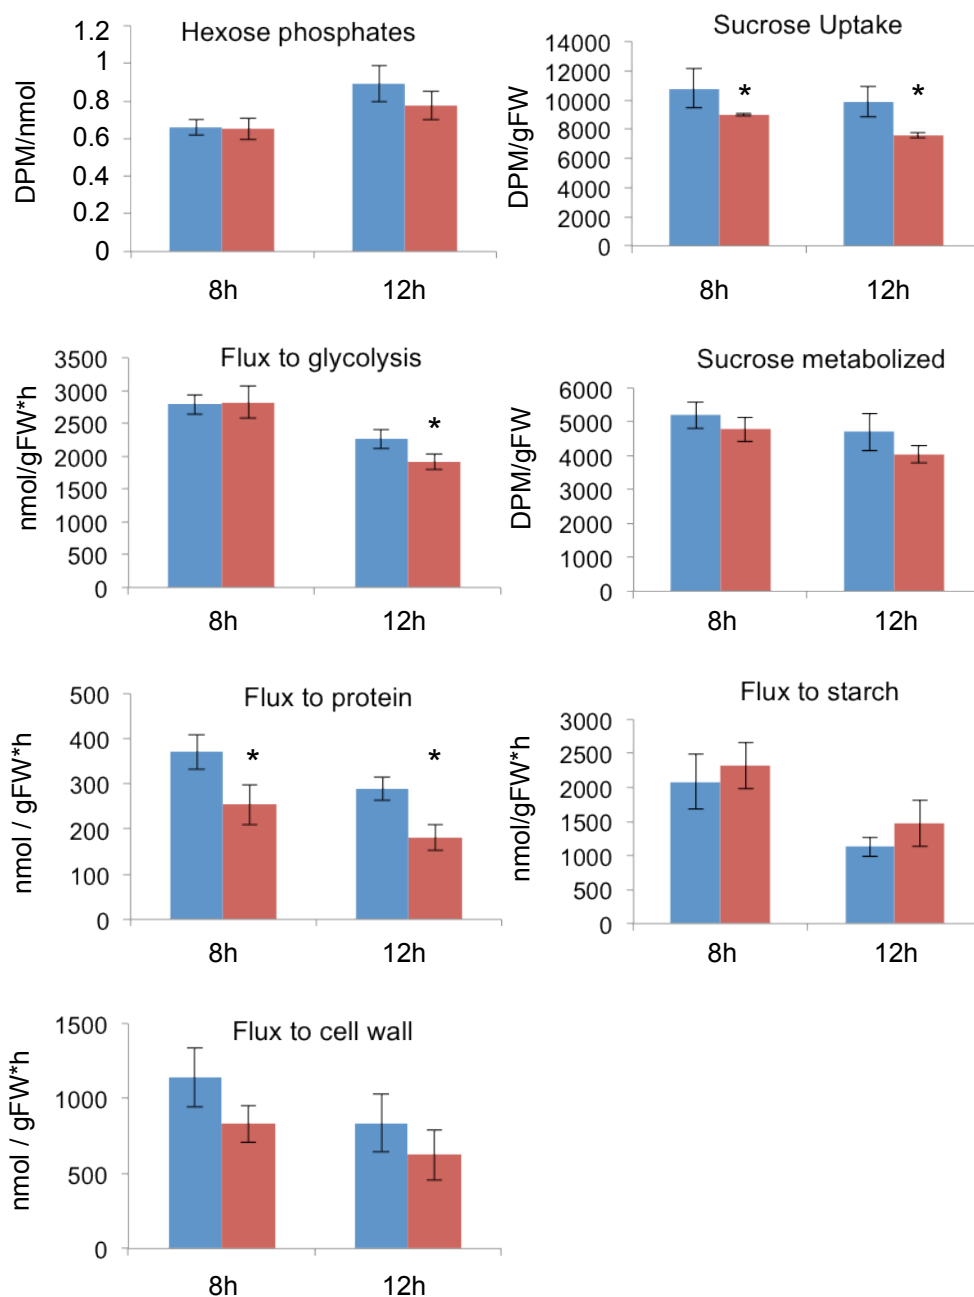

**Figure S3:**  $^{14}\text{C}$ -sucrose based metabolic profiling of mock (blue) and ISX (red) treated seedlings after 8 h and 12 h of treatment. Shown are averages with error bars based on SD (n=3). \* indicate statistical significant difference to mock-treated seedlings based on t-test  $p < 0.05$ .
