# Supplementary material
Source: PubMed Central journal article supplement (PMC3375954)
Supplement: supp_pp.112.195198_195198Wormit_et_al_Sup_Figure_4.pdf [file supp_pp.112.195198_195198Wormit_et_al_Sup_Figure_4.pdf]

Figure S4

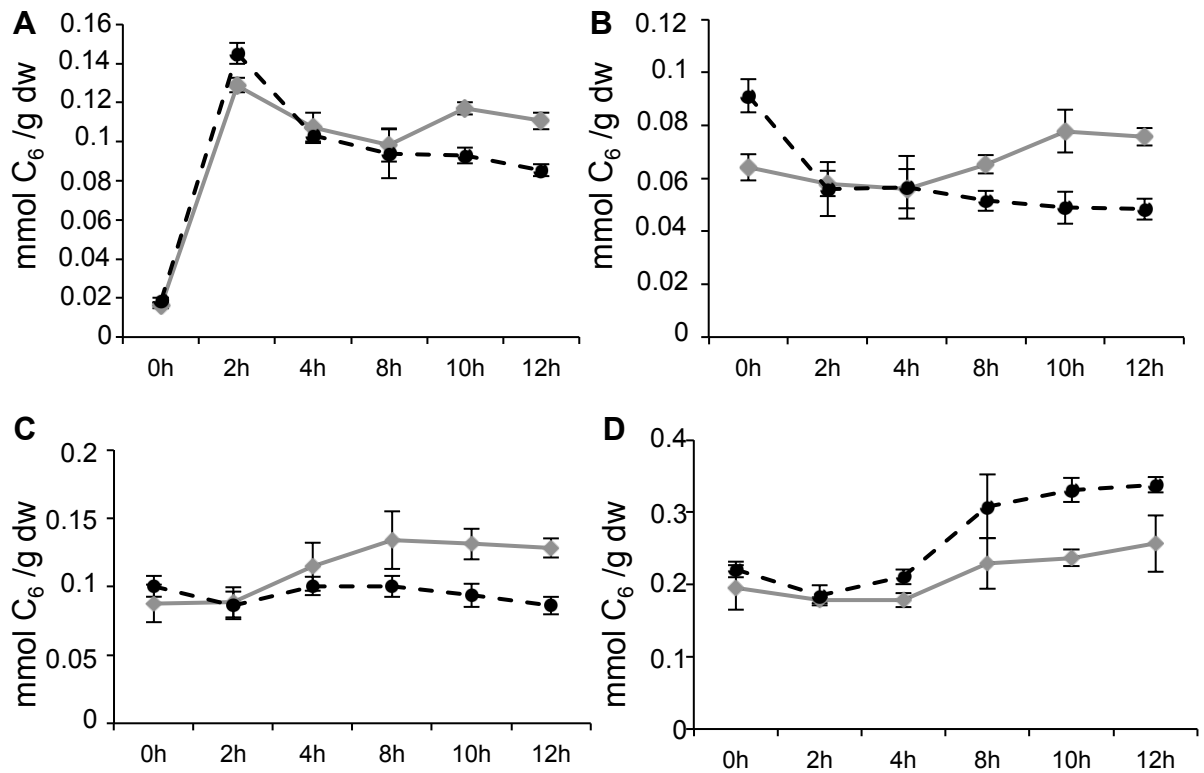

**Figure S4:** Levels of soluble sugars (glucose, fructose, sucrose) and starch in mock (solid grey line) and DCB-treated (dashed black line) seedlings. X-axis shows time in hours and Y-axis shows levels of soluble sugars or starch in mmol C<sub>6</sub> / g dry weight (dw). **(A)** Sucrose, **(B)** Fructose, **(C)** Glucose **(D)** Starch. Error bars are based on SD.
