# Supplementary material
Source: PubMed Central journal article supplement (PMC3375954)
Supplement: supp_pp.112.195198_195198Wormit_et_al_Sup_Figure_5.pdf [file supp_pp.112.195198_195198Wormit_et_al_Sup_Figure_5.pdf]

Figure S5

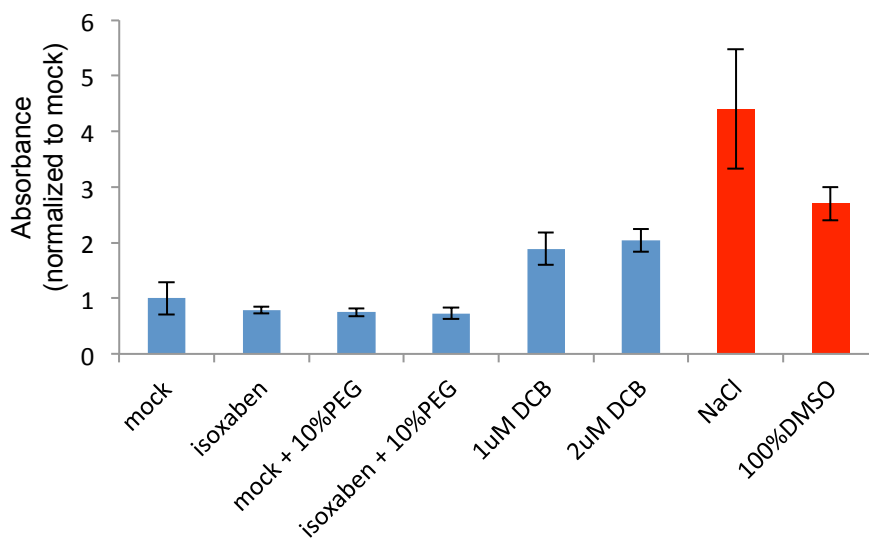

**Figure S5:** Evans blue Stain of Col-0 seedlings treated with different chemicals. The X-axis shows the different treatments performed. Seedlings were either treated for 10 h (mock, ISX, mock 10% PEG, ISX 10% PEG, 1 µM DCB, 2 µM DCB in blue) or 30 minutes (DMSO, 6.15 M NaCl; positive controls for cell death in red) before measurements were performed. Shown are means normalized to mock treatment  $\pm$  SD (n=10 seedlings).
