# Supplementary material
Source: PubMed Central journal article supplement (PMC3375954)
Supplement: supp_pp.112.195198_195198Wormit_et_al_Sup_Figure_6.pdf [file supp_pp.112.195198_195198Wormit_et_al_Sup_Figure_6.pdf]

Figure S6

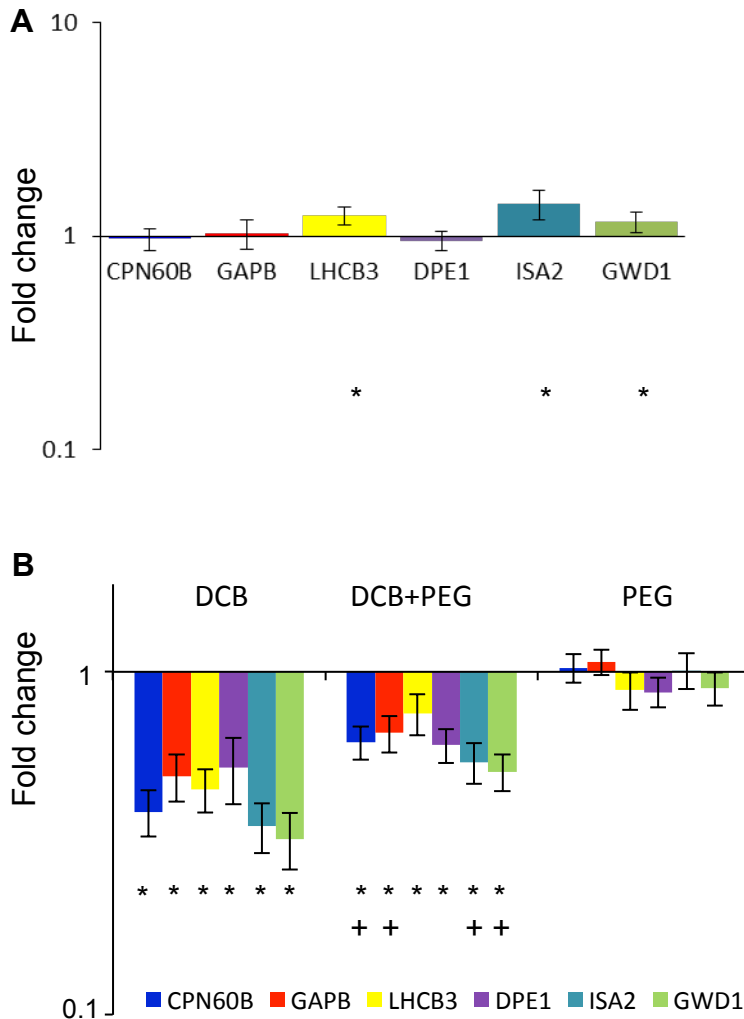

**Figure S6:** qRT-PCR-based expression analysis of genes involved in carbohydrate metabolism in Col-0 seedlings treated with different cellulose biosynthesis inhibitors and / or osmotica.

**A** Expression levels of genes in seedlings treated for 4 h with ISX / 300 mM sorbitol. **B** Expression levels of genes involved in carbohydrate metabolism after 8 h of DCB or DCB / 5% PEG treatment and after 4 h of 5% PEG alone in Col-0 seedlings. Values are the means and SEM from three biological replicates. \* indicates statistical significant difference compared to the expression of the same gene in mock-treated samples. + indicates statistical significant difference of the expression of the same gene in 5% PEG / DCB- vs DCB-treated Col-0 seedlings.
