# Supplementary material
Source: PubMed Central journal article supplement (PMC3375954)
Supplement: supp_pp.112.195198_195198Wormit_et_al_Sup_Figure_7.pdf [file supp_pp.112.195198_195198Wormit_et_al_Sup_Figure_7.pdf]

Figure S7

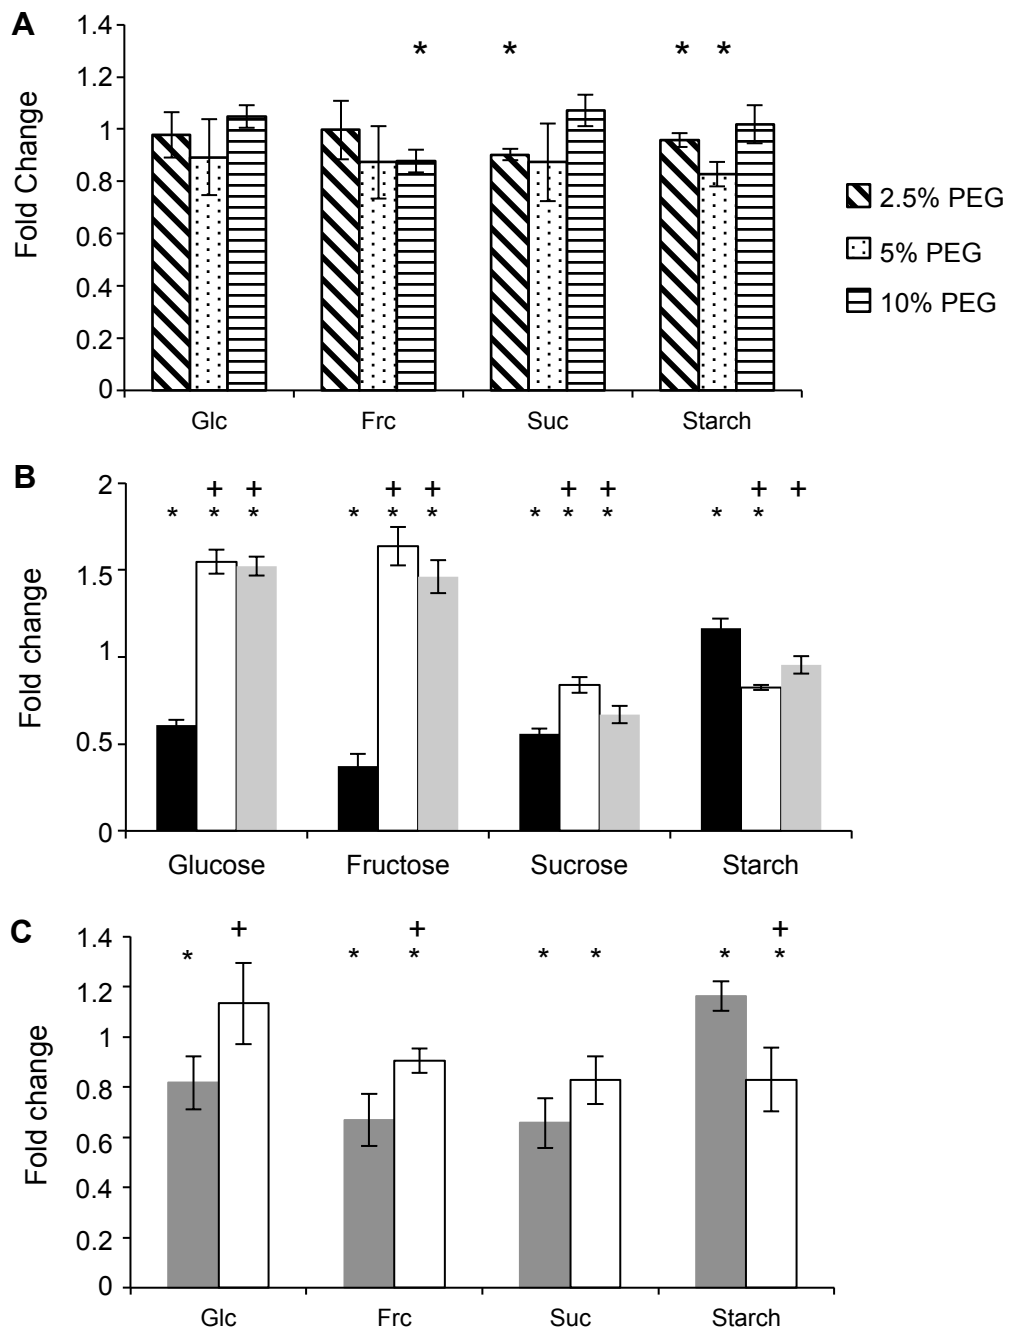

**Figure S7: A** Effects of PEG treatments on soluble sugar levels and starch content in Col-0 seedlings. Data was normalized to the mock-treated Col-0 control. **B** Soluble sugar and starch contents of Col-0 seedlings ISX- (black), 300 mM sorbitol (white) or ISX / 300 mM sorbitol (light-grey) treated for 10 h. **C** Soluble sugar and starch contents of Col-0 seedlings with DCB- (grey) or DCB / 5% PEG (white) for 10 h. Data in **(B)** and **(C)** was normalized to the 10 h mock-treated Col-0 control highlighted by black line. \* indicate statistical significant differences compared to mock-treated seedlings. + indicate statistical significant differences compared to ISX **(B)** or DCB-treated **(C)** seedlings.
